# Supplementary material for: Exome sequencing identifies mutations in the gene TTC7A in French-Canadian cases with hereditary multiple intestinal atresia
Source: PubMed Central journal article supplement — J Med Genet. 2013 Feb 19;50(5):324–9. doi: 10.1136/jmedgenet-2012-101483 (PMC3625823; doi:10.1136/jmedgenet-2012-101483), 2013-02-19
Supplement: jmedgenet-2012-101483-s1.pdf [file jmedgenet-2012-101483-s1.pdf]

**Supplementary Material**

Figure S1. IGV visualization of homozygous mutation c.53344\_53347delAAGT from exome data. All reads show 4 bp deletion, sequence of wild type gene and exon annotation at bottom.

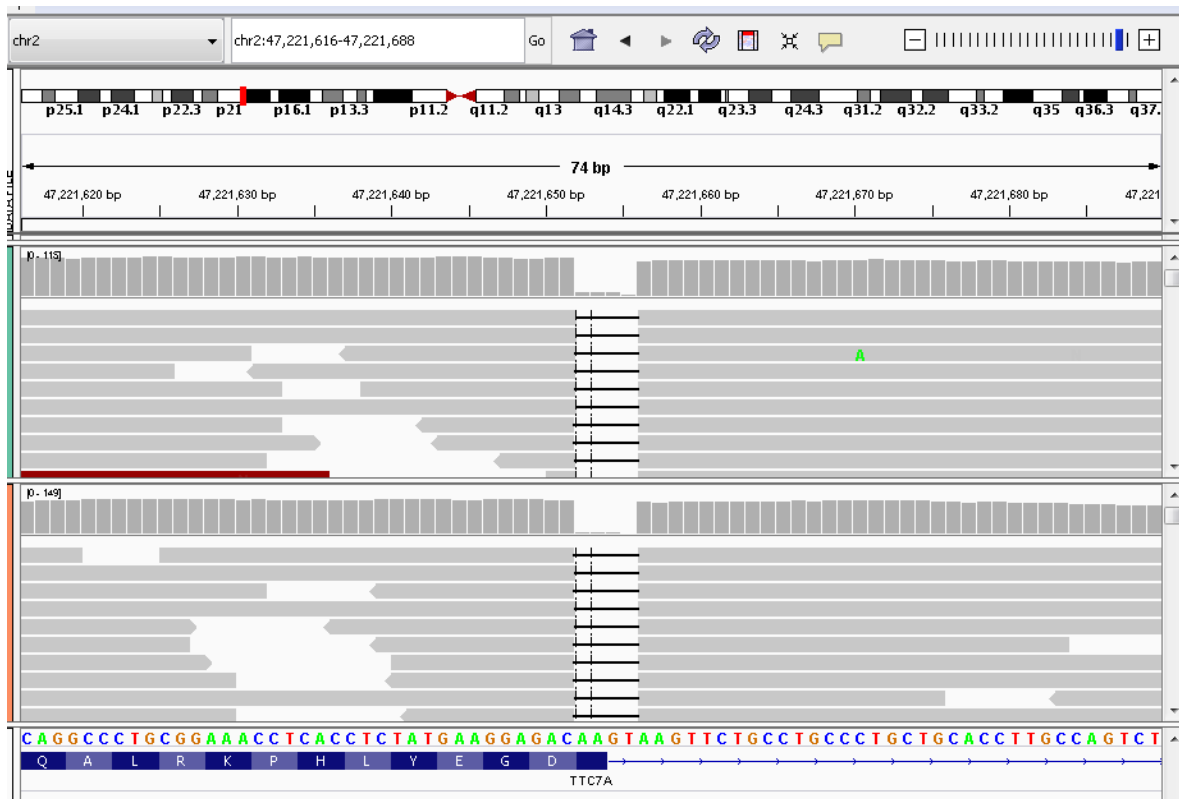

Figure S2. Agarose gel of RT-PCR reaction products from *TTC7A* encompassing exon 7. From left to right, source Hela cell RNA, 100bp size ladder (bottom band 200bp, top band 1000bp, source RNA extracted from human control amniocytes ( band is 780 bp and represents a WT spliced RNA that contains exons 4 to 12 including exon 7), source RNA of amniocytes of affected exome sequenced patient of pedigree 4 (band is 622 bp and represents an RNA that extends from exons 4 to 12 skipping exon 7 deleting 158 bp). See Materials and Methods for details on cells and RT-PCR protocol.

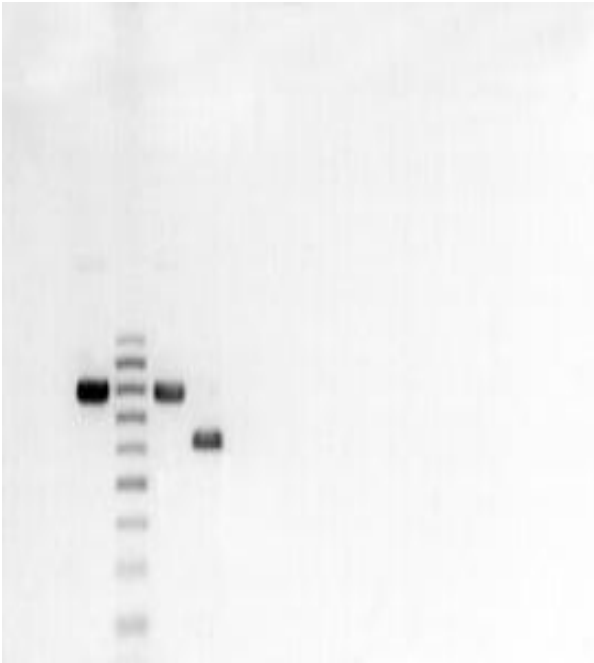

Figure S3. Sequence chromatograms of mutations in *TTC7A* and exon skipping products. A, homozygous mutation c.53344\_53347delAAGT from sampled affected homozygous patient. B, sequence of RT-PCR products from sampled affected patient in family 4, aligned versus *TTC7A* reference cDNA to highlight exon 7 skipping. C, heterozygous mutation c.A133074G; p.L823P. Sequencing by standard PCR-Sanger fluorescent chemistry, visualized with Mutation surveyor. In each panel, top window shows nucleotide sequence of consensus from human genome project above mutant sequence, then amino acid sequence of consensus from human genome project above mutant sequence with exon number annotated. Lower window shows chromatograms for wild type sequence (virtual, generated from consensus genome project annotation), chromatogram from patient, and mutation calling by algorithm. Red arrows point to mutations in patient chromatogram.

# A

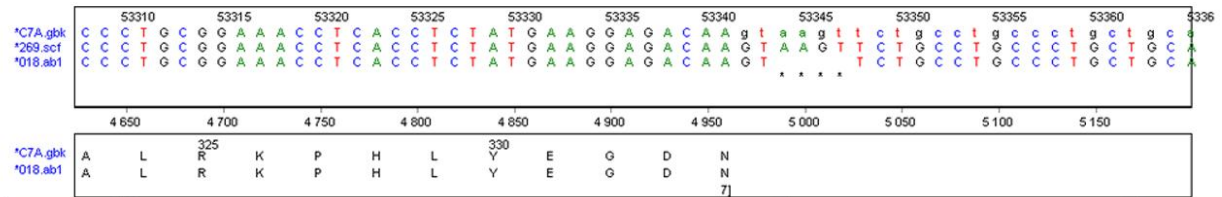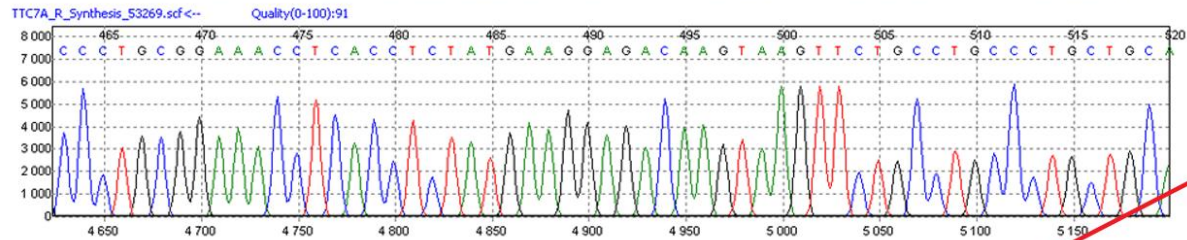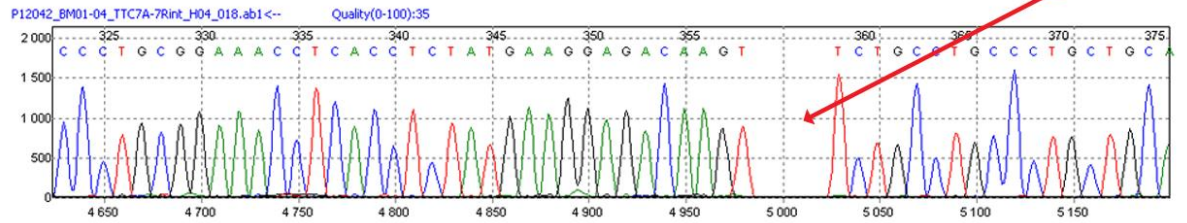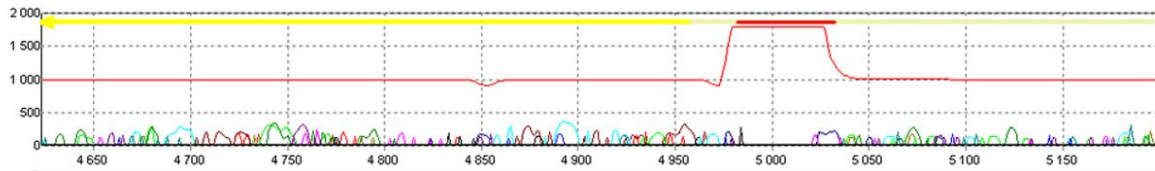

# B

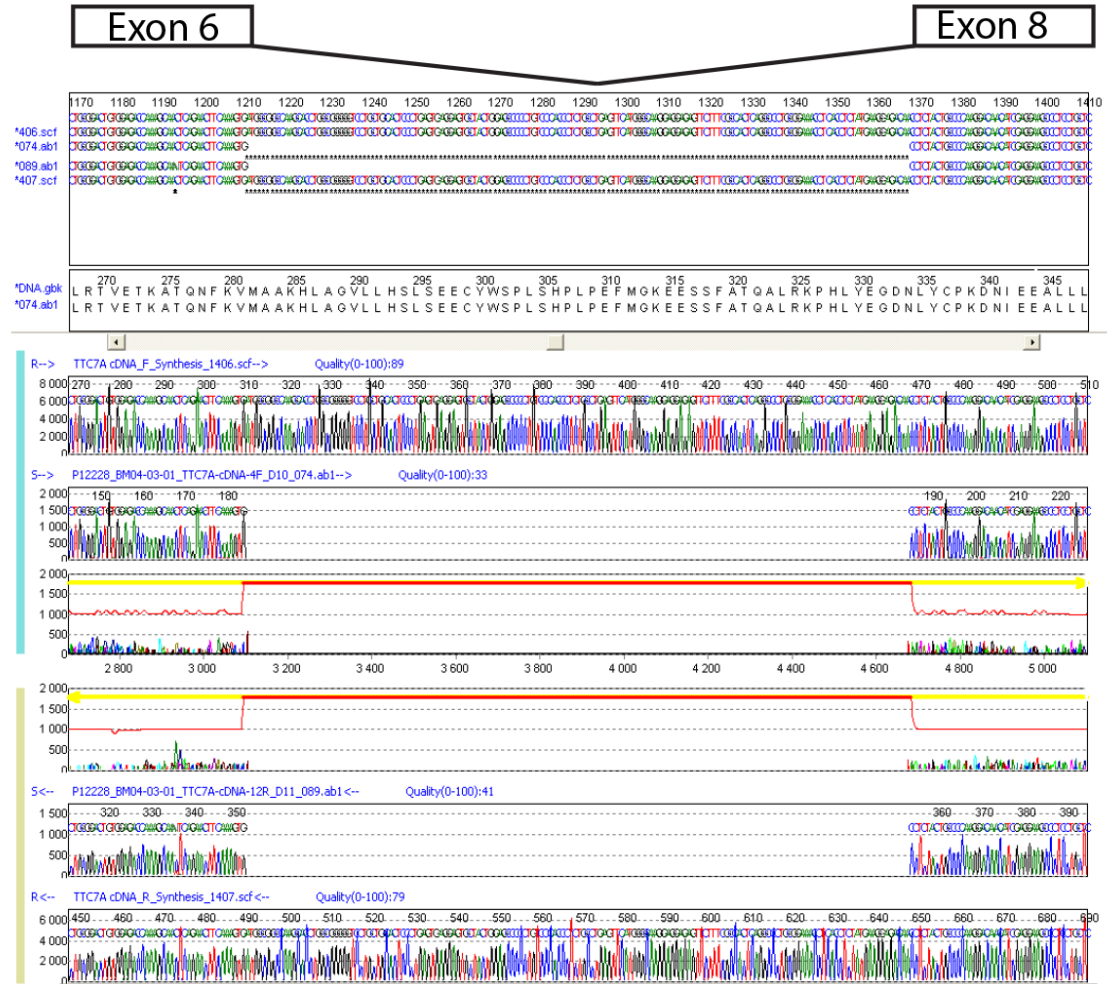

C

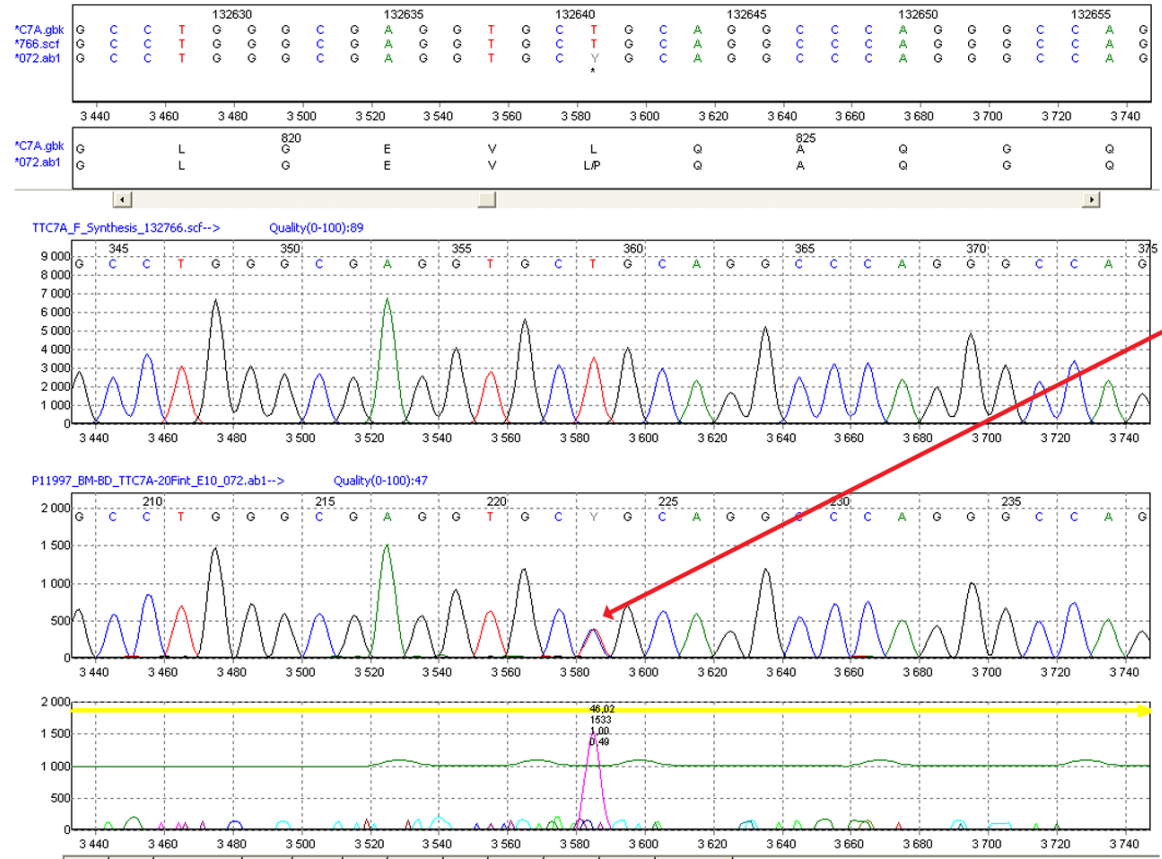

Figure S4. MutationSurveyor visualization of deconvoluted heterozygous mutation c.53344\_53347delAAGT from Sanger sequencing of affected individual in pedigree 7. From top to bottom, panels are virtual wild type chromatogram, actual sequence chromatogram of heterozygous patient, deconvoluted non-deleted patient sequence, deconvoluted deleted patient sequence, deconvoluted correctly offset deleted patient sequence, mutation calling by software algorithm.

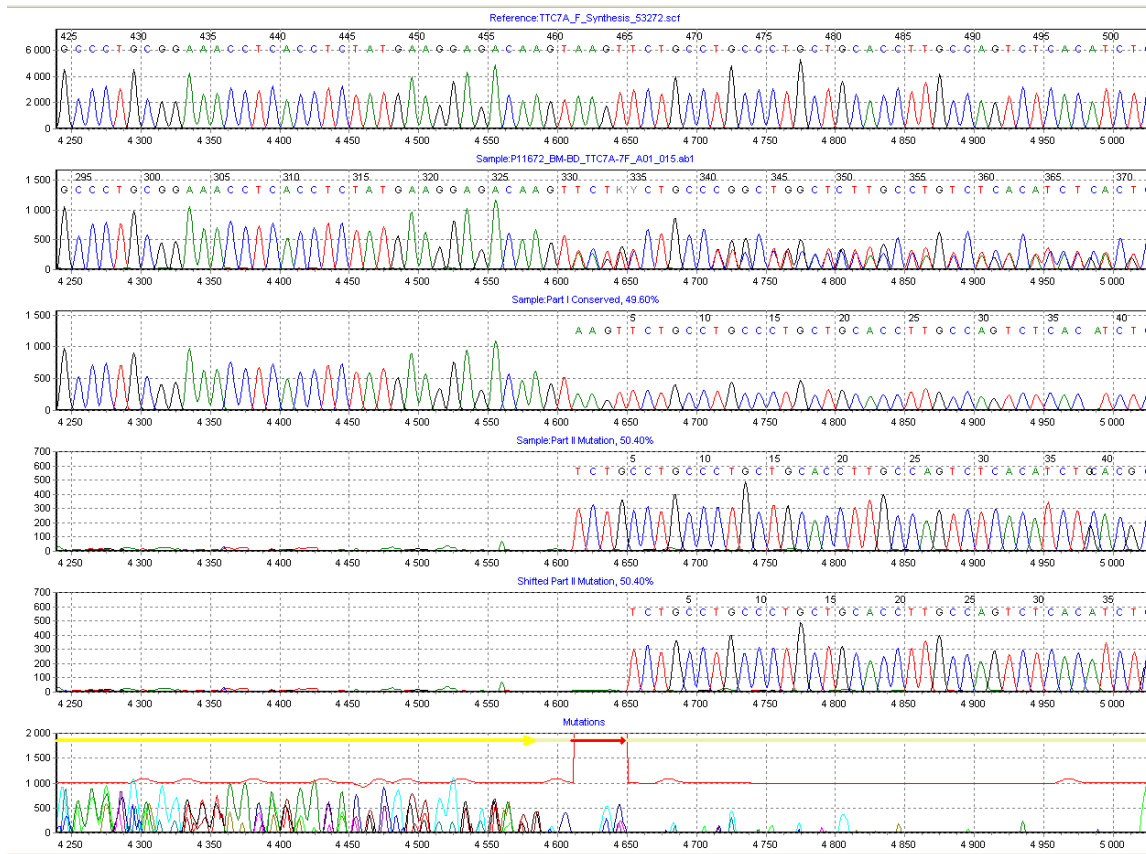

Table S1. Primer sequences for amplification and sequencing of TTC7A coding exons.

| exon | PCR primers <sup>1</sup>                                                                                                                                   | sequencing primer <sup>1</sup>                                      |
|------|------------------------------------------------------------------------------------------------------------------------------------------------------------|---------------------------------------------------------------------|
| 1    | TTC7A-exon1Fint CTCCGCGCGGGATTAAGT<br>TTC7A-1R GAGTCCAGCCAATGCACTGAT                                                                                       | idem<br>idem<br>TTC7A-1Rint TGCAGATACCACCATTTCACG                   |
| 2    | TTC7A-2F CCGAGTCCTGGGA ACTCTGTC<br>TTC7A-2R TGTTGCTCAGGTGACCAAATG                                                                                          | idem<br>idem                                                        |
| 3    | TTC7A-3F GAGGAGGGGAGTTCTGAGCAA<br>TTC7A-3R ACCGGCATCCACCTTAGACAC                                                                                           | idem<br>idem                                                        |
| 4    | TTC7A-4F CTAACACCACCGTCGCTTCAG<br>TTC7A-4R TGGGGACAGAGAAGGTGACT                                                                                            | TTC7A-exon4Fint TGCACCAGAGTGTCTGC<br>idem                           |
| 5    | TTC7A-5F2 GCCCCTGAACA ACTGGGACTGG<br>TTC7A-5R2 GCACGTATGCACAGGCCAGAGA                                                                                      | idem<br>idem                                                        |
| 6    | TTC7A-6F TCCTGGGCCTCTAAAGTCCTG<br>TTC7A-6R TGGGAAAGGATGCTGAGATTG                                                                                           | TTC7A-exon6Fint CACTCCAGTTATCGAATGTGTTCA<br>idem                    |
| 7    | TTC7A-7F AGAGGGGTGGGAGCGCCAGT<br>TTC7A-7R ACCTGGACCCCAACACCTGCCT<br>TTC7A-ex7F-<br>court GGGTCCGAGTGCTTCCCTCT<br>TTC7A-ex7R-<br>court GGGACAGAACCCTGCGTGAG | idem<br>TTC7A-exon7Rint TCTAGTTCATCTGGCTCCTG<br>idem<br>idem        |
| 8    | TTC7A-8F GTGCCATGAATTATGCAGGA<br>TTC7A-8R CCTCCAAATGAAGCCTTCGAC                                                                                            | idem<br>idem                                                        |
| 9-10 | TTC7A-9-10F GGGCCTTTGTGGAGATAGGAA<br>TTC7A-9-10R CCACAGACTCACACCAGCACA                                                                                     | TTC7A-exon10F ATCACCTGTGAGATCATT<br>TTC7A-exon9R GATGGCAAAGAGCAAATG |
| 11   | TTC7A-11F TTCTCTGCCCTGGACCTCTTC                                                                                                                            | idem                                                                |



|       |              |                       |                      |                      |
|-------|--------------|-----------------------|----------------------|----------------------|
|       | TTC7A-11R    | CTCTCTGGAGGCCACAGTTCA | idem                 |                      |
| 12    | TTC7A-12F    | GAGCACAAGGCTTCTGTTTCG | idem                 |                      |
|       | TTC7A-12R    | AGTCTGGGGGAAACAGTGGAA | idem                 |                      |
| 13-14 | TTC7A-13-14F | CTGCAGAGCTGTGTGCTTTGA | idem                 |                      |
|       | TTC7A-13-14R | TGGAAGGCGAGGACACAAATA | idem                 |                      |
| 15    | TTC7A-15F    | GGGCTCCCTTGAGTTGAGTGT | idem                 |                      |
|       | TTC7A-15R    | CCTGTCCTCACCCCTGTCTCT | idem                 |                      |
| 16    | TTC7A-16F    | GCGAGTTAGGGAGGTGAGCAT | idem                 |                      |
|       | TTC7A-16R    | CGCTCTCATTCAAAGCCTCA  | idem                 |                      |
| 17    | TTC7A-17F    | AGTGAGGCTGTCCCATTCTCC | TTC7A-<br>exon17Fint | GTGAGGCTGTCCCATTC    |
|       | TTC7A-17R    | AAGATCAGCCCCAGAAGTTGC | idem                 |                      |
| 18    | TTC7A-18F    | CAGCTGTGGGTGAGAGGACAT | idem                 |                      |
|       | TTC7A-18R    | GCCAGAGGCGAGGACTCTGTA | idem                 |                      |
| 19    | TTC7A-19F    | TGTGTCCCATGCTGTGATTTG | idem                 |                      |
|       | TTC7A-19R    | CCAGGGAACAGCAGTAGCAAG | idem                 |                      |
| 20    | TTC7A-20F    | AGAGCTCCTGCAGTGGGTTTC | TTC7A-<br>exon20Fint | AAGGCACAGTCACTTAACAG |
|       | TTC7A-20R    | CTGTGCTGAGAGTGGGGAGTG | TTC7A-<br>exon20Rint | CATGGGTGAGGGTGAAG    |

1 All sequences are indicated in the 5' to 3' direction

Table S2. Primer sequences for reverse transcription, amplification and sequencing of TTC7A RNA encompassing exon 7.

|                 |                       |                                                                                |
|-----------------|-----------------------|--------------------------------------------------------------------------------|
| TTC7A_cDNAex3F  | aggctttgtcatcaaaggcc  | (mainly in exon 3 with few nucleotides overlapping the junction of exon 3-4)   |
| TTC7A_cDNAex4F  | ctgcaggaattggagaagacc | (mainly in exon 4 with few nucleotides overlapping the junction of exon 4-5)   |
| TTC7A_cDNAex9R  | ccacatctcgagttgcatg   | (mainly in exon 9 with few nucleotides overlapping the junction of exon 8-9)   |
| TTC7A_cDNAex12R | gtgctctgcttctctagcc   | (mainly in exon12 with few nucleotides overlapping the junction of exon 11-12) |
